# Supplementary material for: Myosin motor domains carrying mutations implicated in early or late onset Hypertrophic Cardiomyopathy have similar properties
Source: bioRxiv or medRxiv preprint supplement (doi:10.1101/622738), 2019-08-09
Supplement: Supplementary file [file media-1.pdf]

## Supplementary Information

### Pediatric and adult-onset HCM mutations in the myosin motor domain have similar properties

**Carlos D Vera<sup>1,#</sup>, Chloe A Johnson<sup>2,#</sup>, Jonathan Walklate<sup>2</sup>, Arjun Adhikari<sup>3</sup>, Zoltan Ujfalusi<sup>4</sup>, Marina Svcevic<sup>5</sup>, Srba M Mijailovich<sup>6</sup>, Ariana Combs<sup>1</sup>, Stephen J. Langer<sup>1</sup>, Kathleen M. Ruppel<sup>7</sup>, James A. Spudich<sup>7</sup>, Leslie A. Leinwand<sup>1,\*</sup>, and Michael A. Geeves<sup>2,\*</sup>**

From the <sup>1</sup>BioFrontiers Institute and Department of Molecular, Cellular and Developmental Biology, University of Colorado Boulder, Boulder CO 80309 USA; <sup>2</sup>School of Biosciences, University of Kent, Canterbury UK, CT2 7NJ; <sup>3</sup>Rumi Scientific, San Francisco CA 94107 USA; <sup>4</sup>Department of Biophysics, University of Pécs, Medical School, Szigeti Street 12, H-7624 Pécs, Hungary, <sup>5</sup>Faculty of Science, University of Kragujevac, Serbia; <sup>6</sup>Department of Biology, Illinois Institute of Technology, Chicago IL 60616 USA; <sup>7</sup>Stanford University School of Medicine, Department of Biochemistry, Stanford CA 94305 USA.

Running title:

\*To whom correspondence should be addressed: Michael A. Geeves School of Biosciences, University of Kent, Canterbury, UK, CT2 7NJ [m.a.geeves@kent.ac.uk](mailto:m.a.geeves@kent.ac.uk); Leslie A. Leinwand BioFrontiers Institute and/or Department of Molecular, Cellular and Developmental Biology, University of Colorado, Boulder CO 80309 [leslie.leinwand@colorado.edu](mailto:leslie.leinwand@colorado.edu)

**Table S1.** This table describes a set of queries regarding the clinical frequency of HCM linked or associated mutations in MYH7 assessed using the NCBI tool ClinVar. (<https://www.ncbi.nlm.nih.gov/clinvar/>).

| Mutation in MYH7 | ClinVar Variation ID | Has the mutation been described in more than one person? | Has the mutation been seen in multiple families? | Has the mutation affected associated family members of the patient? | Is it predicted to be pathogenic? | Is it present in large population databases? | Identified as early onset? |
|------------------|----------------------|----------------------------------------------------------|--------------------------------------------------|---------------------------------------------------------------------|-----------------------------------|----------------------------------------------|----------------------------|
| H251N            | n/a                  | No                                                       | No                                               | No                                                                  | No                                | No                                           | Yes                        |
| D382Y            | 237432               | No                                                       | No                                               | No                                                                  | No, VUS                           | No                                           | Yes                        |
| R403Q            | 14087                | Yes                                                      | Yes                                              | Yes                                                                 | Yes                               | No                                           | No                         |
| R453C            | 14089                | Yes                                                      | Yes                                              | Yes                                                                 | Yes                               | No                                           | No                         |
| F540L            | 407186               | Yes                                                      | No                                               | No                                                                  | Yes                               | No                                           | Yes                        |
| P710R            | n/a                  | No                                                       | No                                               | No                                                                  | No                                | No                                           | Yes                        |
| R719W            | 14104                | Yes                                                      | Yes                                              | Yes                                                                 | Yes                               | No                                           | No                         |
| R723G            | 42885                | Yes                                                      | Yes                                              | Yes                                                                 | Yes                               | No                                           | No                         |
| G741R            | 42890                | Yes                                                      | Yes                                              | Yes                                                                 | Yes                               | No                                           | No                         |
| V763M            | 177642               | No                                                       | No                                               | No                                                                  | No, VUS                           | No                                           | Yes                        |

**Table S2. Fitted Rate and Equilibrium Constants of the ATPase cycle.** Highlighted to show which **fitted** & which **measured** and which derived from **assumption** or **detailed balance**.

A. Equilibrium Constants

|                        | <i>Units</i>       | <i><math>\beta</math>-WT</i> | <i>H251N</i> | <i>D382Y</i> | <i>F540L</i> | <i>P710R</i> | <i>V763M</i> | <i>R719W</i> | <i>R723G</i> | <i>G741R</i> |
|------------------------|--------------------|------------------------------|--------------|--------------|--------------|--------------|--------------|--------------|--------------|--------------|
| <b>K<sub>app</sub></b> | $\mu\text{M}$      | 58                           | 60           | 64           | 15.5         | 24           | 27           | 34           | 30           | 23           |
| <b>K<sub>cat</sub></b> | $\text{s}^{-1}$    | 4.5                          | 5.6          | 4.3          | 6.5          | 2.8          | 4.5          | 5.4          | 3.2          | 4.6          |
| <b>K<sub>A</sub></b>   | $\mu\text{M}^{-1}$ | 0.0088                       | 0.0088       | 0.0071       | 0.020        | 0.032        | 0.017        | 0.0076       | 0.014        | 0.014        |
| <b>K<sub>pi</sub></b>  | mM                 | 100                          | 100          | 100          | 100          | 100          | 100          | 100          | 100          | 100          |
| <b>K<sub>D*</sub></b>  |                    | 0.167                        | 0.167        | 0.167        | 0.167        | 0.167        | 0.167        | 0.167        | 0.167        | 0.167        |
| <b>K<sub>D</sub></b>   | $\mu\text{M}$      | 36                           | 36           | 36           | 36           | 36           | 36           | 36           | 36           | 36           |
| <b>K<sub>T</sub></b>   | $\mu\text{M}^{-1}$ | 0.0036                       | 0.0076       | 0.0035       | 0.0019       | 0.0062       | 0.0037       | 0.0080       | 0.0049       | 0.0056       |
| <b>K<sub>T*</sub></b>  |                    | 154                          | 66.6         | 130          | 189.7        | 110.7        | 117.6        | 67.6         | 55.6         | 94           |
| <b>K<sub>T**</sub></b> | $\mu\text{M}$      | 1000                         | 1000         | 1000         | 1000         | 1000         | 1000         | 1000         | 1000         | 1000         |
| <b>K<sub>H</sub></b>   |                    | 7.3                          | 10.6         | 6.0          | 8.8          | 7.3          | 6.2          | 5.7          | 3.8          | 5.2          |
| <b>K<sub>AH</sub></b>  |                    | 51.7                         | 75.9         | 42.6         | 57.9         | 52.5         | 44.0         | 40.3         | 26.9         | 36.6         |

## B. Forward Rate Constants

|                        | <b>Units</b>                    | <b><math>\beta</math>-WT</b> | <b>H251N</b> | <b>D382Y</b> | <b>F540L</b> | <b>P710R</b> | <b>V763M</b> | <b>R719W</b> | <b>R723G</b> | <b>G741R</b> |
|------------------------|---------------------------------|------------------------------|--------------|--------------|--------------|--------------|--------------|--------------|--------------|--------------|
| <b>k<sub>A</sub></b>   | $\mu\text{M}^{-1}\text{s}^{-1}$ | 8.807                        | 8.779        | 7.071        | 19.9         | 31.8         | 16.4         | 7.606        | 13.9         | 13.6         |
| <b>k<sub>Pi</sub></b>  | $\text{s}^{-1}$                 | 10.2                         | 11.9         | 11.3         | 24.7         | 4.3          | 12.1         | 25.4         | 9.9          | 18           |
| <b>k<sub>D*</sub></b>  | $\text{s}^{-1}$                 | 59                           | 56.7         | 64.3         | 55           | 69           | 68           | 96.8         | 106.8        | 71.1         |
| <b>k<sub>D</sub></b>   | $\text{s}^{-1}$                 | 1000                         | 1000         | 1000         | 1000         | 1000         | 1000         | 1000         | 1000         | 1000         |
| <b>k<sub>T</sub></b>   | $\mu\text{M}^{-1}\text{s}^{-1}$ | 10.15                        | 10.00        | 10.15        | 10.03        | 10.23        | 10.14        | 10.01        | 10.05        | 10.01        |
| <b>k<sub>T*</sub></b>  | $\text{s}^{-1}$                 | 1543                         | 666          | 1300         | 1897         | 1106.5       | 1175         | 676          | 556          | 940          |
| <b>k<sub>T**</sub></b> | $\text{s}^{-1}$                 | 1000                         | 1000         | 1000         | 1000         | 1000         | 1000         | 1000         | 1000         | 1000         |
| <b>k<sub>H</sub></b>   | $\text{s}^{-1}$                 | 10.2                         | 14.9         | 8.4          | 11.5         | 10.3         | 8.7          | 7.9          | 5.3          | 7.2          |
| <b>k<sub>AH</sub></b>  | $\text{s}^{-1}$                 | 10.3                         | 15.2         | 8.5          | 11.6         | 10.5         | 8.8          | 8.1          | 5.4          | 7.3          |

### C. Backward Rate Constants

|                        | <b>Units</b>                     | <b><i>β</i>-WT</b> | <b><i>H251N</i></b> | <b><i>D382Y</i></b> | <b><i>F540L</i></b> | <b><i>P710R</i></b> | <b><i>V763M</i></b> | <b><i>R719W</i></b> | <b><i>R723G</i></b> | <b><i>G741R</i></b> |
|------------------------|----------------------------------|--------------------|---------------------|---------------------|---------------------|---------------------|---------------------|---------------------|---------------------|---------------------|
| <b>k<sub>A</sub></b>   | s <sup>-1</sup>                  | 1000               | 1000                | 1000                | 1000                | 1000                | 1000                | 1000                | 1000                | 1000                |
| <b>k<sub>Pi</sub></b>  | mM <sup>-1</sup> s <sup>-1</sup> | 0.102              | 0.119               | 0.113               | 0.247               | 0.043               | 0.121               | 0.254               | 0.099               | 0.18                |
| <b>k<sub>D*</sub></b>  | s <sup>-1</sup>                  | 353.29             | 339.52              | 385.03              | 329.34              | 413.17              | 407.19              | 579.64              | 639.52              | 425.75              |
| <b>k<sub>D</sub></b>   | μM <sup>-1</sup> s <sup>-1</sup> | 27.78              | 27.78               | 27.78               | 27.78               | 27.78               | 27.78               | 27.78               | 27.78               | 27.78               |
| <b>k<sub>T</sub></b>   | s <sup>-1</sup>                  | 3385               | 1311                | 2941                | 5271                | 1650                | 2740                | 1258                | 2050                | 1787                |
| <b>k<sub>T*</sub></b>  | s <sup>-1</sup>                  | 10                 | 10                  | 10                  | 10                  | 10                  | 10                  | 10                  | 10                  | 10                  |
| <b>k<sub>T**</sub></b> | μM <sup>-1</sup> s <sup>-1</sup> | 1                  | 1                   | 1                   | 1                   | 1                   | 1                   | 1                   | 1                   | 1                   |
| <b>k<sub>H</sub></b>   | s <sup>-1</sup>                  | 1.4                | 1.4                 | 1.4                 | 1.4                 | 1.4                 | 1.4                 | 1.4                 | 1.4                 | 1.4                 |
| <b>k<sub>AH</sub></b>  | s <sup>-1</sup>                  | 0.2                | 0.2                 | 0.2                 | 0.2                 | 0.2                 | 0.2                 | 0.2                 | 0.2                 | 0.2                 |

**Table S3. Predicted cross-bridge cycle parameters at three actin concentrations from the modelled ATPase cycle.**

| <i>Isoform</i> | <i>[Actin] (μM)</i>        | <i>ATPase (s<sup>-1</sup>)</i> | <i>Detached</i> | <i>Weakly attached</i> | <i>Strongly attached</i> | <i>Duty Ratio</i> | <i>Velocity (μm/s)</i> |
|----------------|----------------------------|--------------------------------|-----------------|------------------------|--------------------------|-------------------|------------------------|
| <b>β-WT</b>    |                            |                                |                 |                        |                          |                   |                        |
|                | K <sub>app</sub> = 58      | 2.253                          | 0.706           | 0.238                  | 0.056                    | 0.056             | 0.202                  |
|                | 3 K <sub>app</sub> = 174   | 3.378                          | 0.529           | 0.388                  | 0.084                    | 0.084             | 0.202                  |
|                | 20 K <sub>app</sub> = 1160 | 4.287                          | 0.240           | 0.653                  | 0.107                    | 0.107             | 0.199                  |
|                | 3 K <sub>app</sub> + Load  | 1.480                          | 0.448           | 0.465                  | 0.087                    | 0.087             | 0.085                  |
| <b>H251N</b>   |                            |                                |                 |                        |                          |                   |                        |
|                | K <sub>app</sub> = 60      | 2.809                          | 0.674           | 0.252                  | 0.074                    | 0.074             | 0.190                  |
|                | 3 K <sub>app</sub> = 180   | 4.218                          | 0.485           | 0.404                  | 0.111                    | 0.111             | 0.190                  |
|                | 20 K <sub>app</sub> = 1200 | 5.384                          | 0.206           | 0.650                  | 0.144                    | 0.144             | 0.187                  |
|                | 3 K <sub>app</sub> + Load  | 1.787                          | 0.415           | 0.475                  | 0.110                    | 0.110             | 0.081                  |
| <b>D382Y</b>   |                            |                                |                 |                        |                          |                   |                        |
|                | K <sub>app</sub> = 64      | 2.154                          | 0.737           | 0.212                  | 0.051                    | 0.051             | 0.213                  |
|                | 3 K <sub>app</sub> = 192   | 3.230                          | 0.567           | 0.356                  | 0.076                    | 0.076             | 0.212                  |
|                | 20 K <sub>app</sub> = 1280 | 4.099                          | 0.258           | 0.644                  | 0.099                    | 0.099             | 0.209                  |
|                | 3 K <sub>app</sub> + Load  | 1.483                          | 0.487           | 0.432                  | 0.081                    | 0.081             | 0.091                  |
| <b>F540L</b>   |                            |                                |                 |                        |                          |                   |                        |
|                | K <sub>app</sub> = 15.5    | 3.255                          | 0.776           | 0.140                  | 0.084                    | 0.084             | 0.194                  |
|                | 3 K <sub>app</sub> = 46.5  | 4.883                          | 0.652           | 0.222                  | 0.126                    | 0.126             | 0.194                  |
|                | 20 K <sub>app</sub> = 310  | 6.188                          | 0.456           | 0.384                  | 0.160                    | 0.160             | 0.193                  |
|                | 3 K <sub>app</sub> + Load  | 2.364                          | 0.553           | 0.301                  | 0.147                    | 0.147             | 0.080                  |

| <b>P710R</b> |                           |       |       |       |       |       |       |
|--------------|---------------------------|-------|-------|-------|-------|-------|-------|
|              | $K_{app} = 24$            | 1.408 | 0.635 | 0.334 | 0.032 | 0.032 | 0.222 |
|              | 3 $K_{app} = 72$          | 2.112 | 0.443 | 0.509 | 0.048 | 0.048 | 0.222 |
|              | 20 $K_{app} = 480$        | 2.676 | 0.226 | 0.713 | 0.061 | 0.061 | 0.220 |
|              | 3 $K_{app} + \text{Load}$ | 0.825 | 0.371 | 0.586 | 0.043 | 0.043 | 0.097 |
| <b>V763M</b> |                           |       |       |       |       |       |       |
|              | $K_{app} = 27$            | 2.254 | 0.752 | 0.197 | 0.051 | 0.051 | 0.221 |
|              | 3 $K_{app} = 81$          | 3.381 | 0.609 | 0.314 | 0.077 | 0.077 | 0.220 |
|              | 20 $K_{app} = 540$        | 4.290 | 0.368 | 0.534 | 0.099 | 0.099 | 0.218 |
|              | 3 $K_{app} + \text{Load}$ | 1.562 | 0.512 | 0.407 | 0.081 | 0.081 | 0.096 |
| <b>R719W</b> |                           |       |       |       |       |       |       |
|              | $K_{app} = 34$            | 2.703 | 0.826 | 0.123 | 0.051 | 0.051 | 0.264 |
|              | 3 $K_{app} = 102$         | 4.054 | 0.709 | 0.214 | 0.077 | 0.077 | 0.262 |
|              | 20 $K_{app} = 680$        | 5.144 | 0.429 | 0.470 | 0.101 | 0.101 | 0.255 |
|              | 3 $K_{app} + \text{Load}$ | 2.137 | 0.63  | 0.284 | 0.085 | 0.085 | 0.126 |
| <b>R723G</b> |                           |       |       |       |       |       |       |
|              | $K_{app} = 34$            | 1.601 | 0.795 | 0.175 | 0.029 | 0.029 | 0.272 |
|              | 3 $K_{app} = 102$         | 2.402 | 0.668 | 0.287 | 0.045 | 0.045 | 0.269 |
|              | 20 $K_{app} = 680$        | 3.048 | 0.408 | 0.532 | 0.060 | 0.060 | 0.255 |
|              | 3 $K_{app} + \text{Load}$ | 1.176 | 0.573 | 0.383 | 0.044 | 0.044 | 0.134 |
| <b>G741R</b> |                           |       |       |       |       |       |       |
|              | $K_{app} = 23$            | 2.300 | 0.810 | 0.139 | 0.051 | 0.029 | 0.225 |
|              | 3 $K_{app} = 69$          | 3.447 | 0.700 | 0.228 | 0.077 | 0.045 | 0.224 |
|              | 20 $K_{app} = 460$        | 4.376 | 0.461 | 0.440 | 0.099 | 0.060 | 0.221 |
|              | 3 $K_{app} + \text{Load}$ | 1.740 | 0.601 | 0.311 | 0.088 | 0.044 | 0.099 |

**Table S4. Predicted Occupancy of the 8 states during the ATPase cycle.**

| <i>Isoform</i> | <i>[Actin] (μM)</i>       | <i>A·M</i> | <i>A·M·T</i> | <i>A-M·T</i> | <i>M·T</i> | <i>M·D·Pi</i> | <i>A-M·D·Pi</i> | <i>A·MD</i> | <i>A·M-D</i> |
|----------------|---------------------------|------------|--------------|--------------|------------|---------------|-----------------|-------------|--------------|
| <b>β-WT</b>    |                           |            |              |              |            |               |                 |             |              |
|                | $K_{app} = 58$            | 0.000132   | 0.001574     | 0.01754      | 0.267297   | 0.438699      | 0.220839        | 0.051667    | 0.002253     |
|                | $3 K_{app} = 174$         | 0.000209   | 0.002557     | 0.056648     | 0.309971   | 0.218574      | 0.33118         | 0.077483    | 0.003378     |
|                | $20 K_{app} = 1160$       | 0.000323   | 0.004287     | 0.232348     | 0.198731   | 0.041363      | 0.420322        | 0.098338    | 0.004287     |
|                | $3 K_{app} + \text{Load}$ | 0.000093   | 0.00115      | 0.029492     | 0.162755   | 0.285732      | 0.43521         | 0.084088    | 0.00148      |
| <b>H251N</b>   |                           |            |              |              |            |               |                 |             |              |
|                | $K_{app} = 60$            | 0.000173   | 0.004454     | 0.015668     | 0.218803   | 0.455634      | 0.236087        | 0.066372    | 0.002809     |
|                | $3 K_{app} = 180$         | 0.00027    | 0.007079     | 0.04972      | 0.257486   | 0.227158      | 0.354427        | 0.099642    | 0.004218     |
|                | $20 K_m = 1200$           | 0.000397   | 0.011051     | 0.197517     | 0.162741   | 0.043205      | 0.452493        | 0.127211    | 0.005385     |
|                | $3 K_{app} = \text{Load}$ | 0.000116   | 0.00305      | 0.024418     | 0.127765   | 0.287013      | 0.450574        | 0.105276    | 0.001787     |
| <b>D382Y</b>   |                           |            |              |              |            |               |                 |             |              |
|                | $K_{app} = 64$            | 0.000148   | 0.001824     | 0.021742     | 0.309623   | 0.427462      | 0.190643        | 0.046403    | 0.002154     |
|                | $3 K_{app} = 192$         | 0.000239   | 0.003028     | 0.070592     | 0.354479   | 0.213007      | 0.285848        | 0.069576    | 0.00323      |
|                | $20 K_{app} = 1280$       | 0.000389   | 0.005313     | 0.28076      | 0.21808    | 0.0403        | 0.362762        | 0.088298    | 0.004099     |
|                | $3 K_{app} + \text{Load}$ | 0.000113   | 0.001437     | 0.038579     | 0.19503    | 0.291638      | 0.393646        | 0.078075    | 0.001483     |
| <b>F540L</b>   |                           |            |              |              |            |               |                 |             |              |
|                | $K_{app} = 15.5$          | 0.00025    | 0.001759     | 0.008259     | 0.33211    | 0.443935      | 0.131768        | 0.078665    | 0.003255     |
|                | $3 K_{app} = 46.5$        | 0.000382   | 0.002703     | 0.024552     | 0.431499   | 0.220288      | 0.197679        | 0.118014    | 0.004883     |
|                | $20 K_{app} = 310$        | 0.000541   | 0.003963     | 0.133042     | 0.414746   | 0.041443      | 0.250519        | 0.149559    | 0.006188     |
|                | $3 K_{app} + \text{Load}$ | 0.000186   | 0.001316     | 0.013164     | 0.236567   | 0.315961      | 0.287292        | 0.14315     | 0.002364     |



| <b>P710R</b> |                           |          |          |          |          |          |          |          |          |
|--------------|---------------------------|----------|----------|----------|----------|----------|----------|----------|----------|
|              | $K_{app} = 24$            | 0.00007  | 0.001328 | 0.006069 | 0.197117 | 0.437646 | 0.327518 | 0.028844 | 0.001408 |
|              | $3 K_{app} = 72$          | 0.000108 | 0.002073 | 0.018174 | 0.22613  | 0.217052 | 0.4911   | 0.04325  | 0.002112 |
|              | $20 K_{app} = 480$        | 0.000157 | 0.003237 | 0.090651 | 0.185307 | 0.040951 | 0.622223 | 0.054798 | 0.002676 |
|              | $3 K_{app} + \text{Load}$ | 0.000043 | 0.000829 | 0.00919  | 0.116939 | 0.25453  | 0.576841 | 0.040804 | 0.000825 |
| <b>V763M</b> |                           |          |          |          |          |          |          |          |          |
|              | $K_{app} = 27$            | 0.000153 | 0.002009 | 0.010817 | 0.322274 | 0.429578 | 0.186273 | 0.046642 | 0.002254 |
|              | $3 K_{app} = 81$          | 0.000238 | 0.003173 | 0.034973 | 0.395032 | 0.213763 | 0.279462 | 0.069976 | 0.003381 |
|              | $20 K_{app} = 540$        | 0.000364 | 0.005173 | 0.17926  | 0.327191 | 0.040396 | 0.354548 | 0.088777 | 0.00429  |
|              | $3 K_{app} + \text{Load}$ | 0.000111 | 0.00149  | 0.018962 | 0.217227 | 0.294713 | 0.387664 | 0.078269 | 0.001562 |
| <b>R719W</b> |                           |          |          |          |          |          |          |          |          |
|              | $K_{app} = 34$            | 0.00016  | 0.004239 | 0.016205 | 0.402397 | 0.423751 | 0.10643  | 0.044114 | 0.002703 |
|              | $3 K_{app} = 102$         | 0.000252 | 0.0068   | 0.054283 | 0.497848 | 0.211017 | 0.159595 | 0.066151 | 0.004054 |
|              | $20 K_{app} = 680$        | 0.000393 | 0.011566 | 0.267449 | 0.389183 | 0.039778 | 0.202536 | 0.08395  | 0.005144 |
|              | $3 K_{app} + \text{Load}$ | 0.000134 | 0.003642 | 0.032533 | 0.301177 | 0.32898  | 0.252376 | 0.07902  | 0.002137 |
| <b>R723G</b> |                           |          |          |          |          |          |          |          |          |
|              | $K_{app} = 30$            | 0.000159 | 0.003123 | 0.013507 | 0.400951 | 0.394325 | 0.16175  | 0.024583 | 0.001601 |
|              | $3 K_{app} = 90$          | 0.000257 | 0.005121 | 0.044512 | 0.471752 | 0.196445 | 0.242636 | 0.036875 | 0.002402 |
|              | $20 K_{app} = 600$        | 0.000449 | 0.009515 | 0.224245 | 0.370936 | 0.037177 | 0.307845 | 0.046786 | 0.003048 |
|              | $3 K_{app} + \text{Load}$ | 0.000129 | 0.002596 | 0.026698 | 0.285736 | 0.287157 | 0.356425 | 0.040083 | 0.001176 |
| <b>G741R</b> |                           |          |          |          |          |          |          |          |          |
|              | $K_{app} = 23$            | 0.000137 | 0.002561 | 0.011178 | 0.391861 | 0.418379 | 0.127549 | 0.046039 | 0.002296 |
|              | $3 K_{app} = 69$          | 0.000214 | 0.004057 | 0.036646 | 0.486628 | 0.208406 | 0.191487 | 0.069117 | 0.003447 |
|              | $20 K_{app} = 460$        | 0.000328 | 0.006748 | 0.196699 | 0.421612 | 0.039383 | 0.243105 | 0.087749 | 0.004376 |
|              | $3 K_{app} + \text{Load}$ | 0.000109 | 0.002079 | 0.021418 | 0.288297 | 0.31256  | 0.289969 | 0.083828 | 0.00174  |

**Table S5. Resolution matrices.**

| <b><math>\beta</math>-WT</b> | <b>K<sub>A</sub></b> | <b>k<sub>pi</sub></b> | <b>k<sub>-T</sub></b> | <b>K<sub>H</sub></b> | <b>K<sub>AH</sub></b> |
|------------------------------|----------------------|-----------------------|-----------------------|----------------------|-----------------------|
| <b>K<sub>A</sub></b>         | 0.78958              | 0.23154               | -0.00011              | -0.22247             | -0.23324              |
| <b>k<sub>pi</sub></b>        | 0.23154              | 0.73303               | 0.00010               | 0.26596              | 0.26647               |
| <b>k<sub>-T</sub></b>        | -0.00011             | 0.00010               | 0.00000               | 0.00010              | 0.00010               |
| <b>K<sub>H</sub></b>         | -0.22247             | 0.26596               | 0.00010               | 0.72312              | -0.26164              |
| <b>K<sub>AH</sub></b>        | -0.23324             | 0.26647               | 0.00010               | -0.26164             | 0.73076               |

| <b>H251N</b>          | <b>K<sub>A</sub></b> | <b>k<sub>pi</sub></b> | <b>k<sub>-T</sub></b> | <b>K<sub>H</sub></b> | <b>K<sub>AH</sub></b> |
|-----------------------|----------------------|-----------------------|-----------------------|----------------------|-----------------------|
| <b>K<sub>A</sub></b>  | 0.83786              | 0.17829               | -0.00014              | -0.21500             | -0.22464              |
| <b>k<sub>pi</sub></b> | 0.17829              | 0.79644               | 0.00015               | 0.25242              | 0.25465               |
| <b>k<sub>-T</sub></b> | -0.00014             | 0.00015               | 0.00000               | 0.00009              | 0.00013               |
| <b>K<sub>H</sub></b>  | -0.21500             | 0.25242               | 0.00009               | 0.67606              | -0.31222              |
| <b>K<sub>AH</sub></b> | -0.22464             | 0.25465               | 0.00013               | -0.31222             | 0.67846               |

| <b>D382Y</b>          | <b>K<sub>A</sub></b> | <b>k<sub>pi</sub></b> | <b>k<sub>-T</sub></b> | <b>K<sub>H</sub></b> | <b>K<sub>AH</sub></b> |
|-----------------------|----------------------|-----------------------|-----------------------|----------------------|-----------------------|
| <b>K<sub>A</sub></b>  | 0.72416              | 0.30169               | -0.00006              | -0.21910             | -0.22924              |
| <b>k<sub>pi</sub></b> | 0.30169              | 0.65641               | 0.00008               | 0.25910              | 0.25865               |
| <b>k<sub>-T</sub></b> | -0.00006             | 0.00008               | 0.00000               | 0.00007              | 0.00011               |
| <b>K<sub>H</sub></b>  | -0.21910             | 0.25910               | 0.00007               | 0.79385              | -0.19167              |
| <b>K<sub>AH</sub></b> | -0.22924             | 0.25865               | 0.00011               | -0.19167             | 0.80255               |

| <b>F540L</b>          | <b>K<sub>A</sub></b> | <b>k<sub>pi</sub></b> | <b>k-τ</b> | <b>K<sub>H</sub></b> | <b>K<sub>AH</sub></b> |
|-----------------------|----------------------|-----------------------|------------|----------------------|-----------------------|
| <b>K<sub>A</sub></b>  | 0.62203              | 0.40143               | -0.00012   | -0.18730             | -0.19048              |
| <b>k<sub>pi</sub></b> | 0.40143              | 0.57004               | 0.00006    | 0.20191              | 0.20355               |
| <b>k-τ</b>            | -0.00012             | 0.00006               | 0.00000    | 0.00021              | 0.00020               |
| <b>K<sub>H</sub></b>  | -0.18730             | 0.20191               | 0.00021    | 0.90401              | -0.09509              |
| <b>K<sub>AH</sub></b> | -0.19048             | 0.20355               | 0.00020    | -0.09509             | 0.90286               |

| <b>P710R</b>          | <b>K<sub>A</sub></b> | <b>k<sub>pi</sub></b> | <b>k-τ</b> | <b>K<sub>H</sub></b> | <b>K<sub>AH</sub></b> |
|-----------------------|----------------------|-----------------------|------------|----------------------|-----------------------|
| <b>K<sub>A</sub></b>  | 0.93500              | 0.05948               | -0.00008   | -0.11846             | -0.14659              |
| <b>k<sub>pi</sub></b> | 0.05948              | 0.92038               | 0.00007    | 0.18357              | 0.18806               |
| <b>k-τ</b>            | -0.00008             | 0.00007               | 0.00000    | 0.00003              | 0.00002               |
| <b>K<sub>H</sub></b>  | -0.11846             | 0.18357               | 0.00003    | 0.54305              | -0.42043              |
| <b>K<sub>AH</sub></b> | -0.14659             | 0.18806               | 0.00002    | -0.42043             | 0.53847               |

| <b>V763M</b>          | <b>K<sub>A</sub></b> | <b>k<sub>pi</sub></b> | <b>k-τ</b> | <b>K<sub>H</sub></b> | <b>K<sub>AH</sub></b> |
|-----------------------|----------------------|-----------------------|------------|----------------------|-----------------------|
| <b>K<sub>A</sub></b>  | 0.71253              | 0.31248               | -0.00011   | -0.22232             | -0.22899              |
| <b>k<sub>pi</sub></b> | 0.31248              | 0.65100               | 0.00007    | 0.25277              | 0.25430               |
| <b>k-τ</b>            | -0.00011             | 0.00007               | 0.00000    | 0.00012              | 0.00011               |
| <b>K<sub>H</sub></b>  | -0.22232             | 0.25277               | 0.00012    | 0.81263              | -0.18252              |
| <b>K<sub>AH</sub></b> | -0.22899             | 0.25430               | 0.00011    | -0.18252             | 0.81265               |

| <b>R719W</b>          | <b>K<sub>A</sub></b> | <b>k<sub>pi</sub></b> | <b>k-τ</b> | <b>K<sub>H</sub></b> | <b>K<sub>AH</sub></b> |
|-----------------------|----------------------|-----------------------|------------|----------------------|-----------------------|
| <b>K<sub>A</sub></b>  | 0.57587              | 0.44828               | -0.00007   | -0.13908             | -0.14345              |
| <b>k<sub>pi</sub></b> | 0.44828              | 0.51994               | 0.00011    | 0.15156              | 0.15283               |
| <b>k-τ</b>            | -0.00007             | 0.00011               | 0.00001    | 0.00012              | 0.00012               |
| <b>K<sub>H</sub></b>  | -0.13908             | 0.15156               | 0.00012    | 0.95001              | -0.04746              |
| <b>K<sub>AH</sub></b> | -0.14345             | 0.15283               | 0.00012    | -0.04746             | 0.95048               |

| <b>R723G</b>          | <b>K<sub>A</sub></b> | <b>k<sub>pi</sub></b> | <b>k-τ</b> | <b>K<sub>H</sub></b> | <b>K<sub>AH</sub></b> |
|-----------------------|----------------------|-----------------------|------------|----------------------|-----------------------|
| <b>K<sub>A</sub></b>  | 0.68987              | 0.26278               | -0.00015   | -0.09877             | -0.14615              |
| <b>k<sub>pi</sub></b> | 0.26278              | 0.76206               | 0.00006    | 0.09866              | 0.12967               |
| <b>k-τ</b>            | -0.00015             | 0.00006               | 0.00000    | 0.00009              | 0.00007               |
| <b>K<sub>H</sub></b>  | -0.09877             | 0.09866               | 0.00009    | 0.95055              | -0.05082              |
| <b>K<sub>AH</sub></b> | -0.14615             | 0.12967               | 0.00007    | -0.05082             | 0.92613               |

| <b>G741R</b>          | <b>K<sub>A</sub></b> | <b>k<sub>pi</sub></b> | <b>k-τ</b> | <b>K<sub>H</sub></b> | <b>K<sub>AH</sub></b> |
|-----------------------|----------------------|-----------------------|------------|----------------------|-----------------------|
| <b>K<sub>A</sub></b>  | 0.60262              | 0.41547               | -0.00016   | -0.16199             | -0.17080              |
| <b>k<sub>pi</sub></b> | 0.41547              | 0.55769               | 0.00007    | 0.17552              | 0.18082               |
| <b>k-τ</b>            | -0.00016             | 0.00007               | 0.00001    | 0.00016              | 0.00013               |
| <b>K<sub>H</sub></b>  | -0.16199             | 0.17552               | 0.00016    | 0.92789              | -0.07077              |
| <b>K<sub>AH</sub></b> | -0.17080             | 0.18082               | 0.00013    | -0.07077             | 0.92479               |

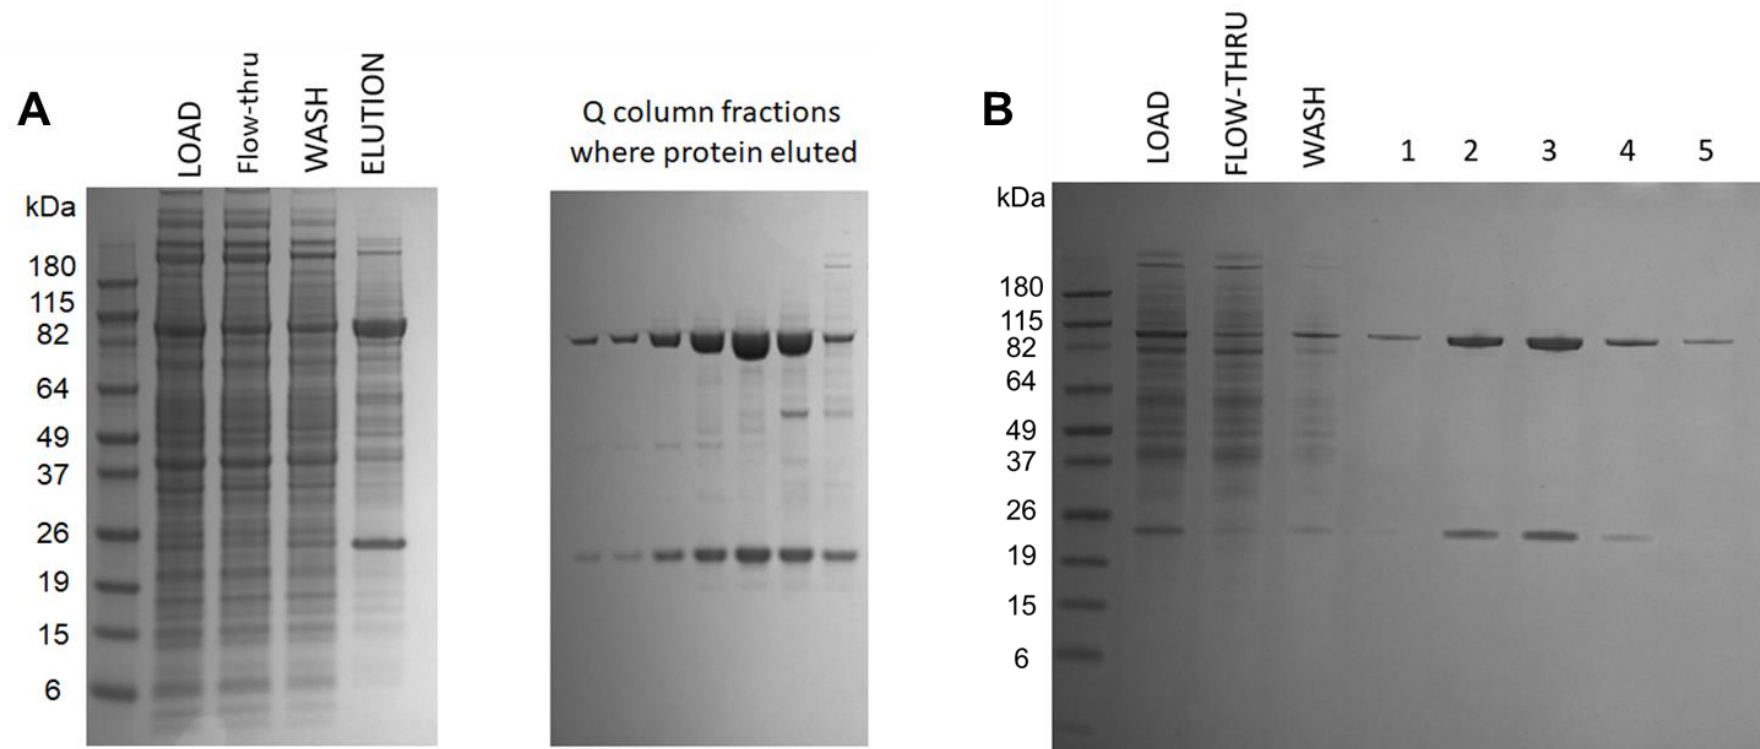

**Figure S1.** (A) Representative gels from a purification of  $\beta$ -R719W. Left is a His-NTA column by gravity flow starting with the lysate and ending with the imidazole eluted sS1. On the right is part of a gel with the sS1 containing fractions. (B) is a representative gel from a purification of  $\beta$ -V763M. After a gravity His column, the solution was loaded on a PDZ column, where the collected fractions also resulted in clean sS1 (sS1: 93 kDa, MYL3: 25 kDa).

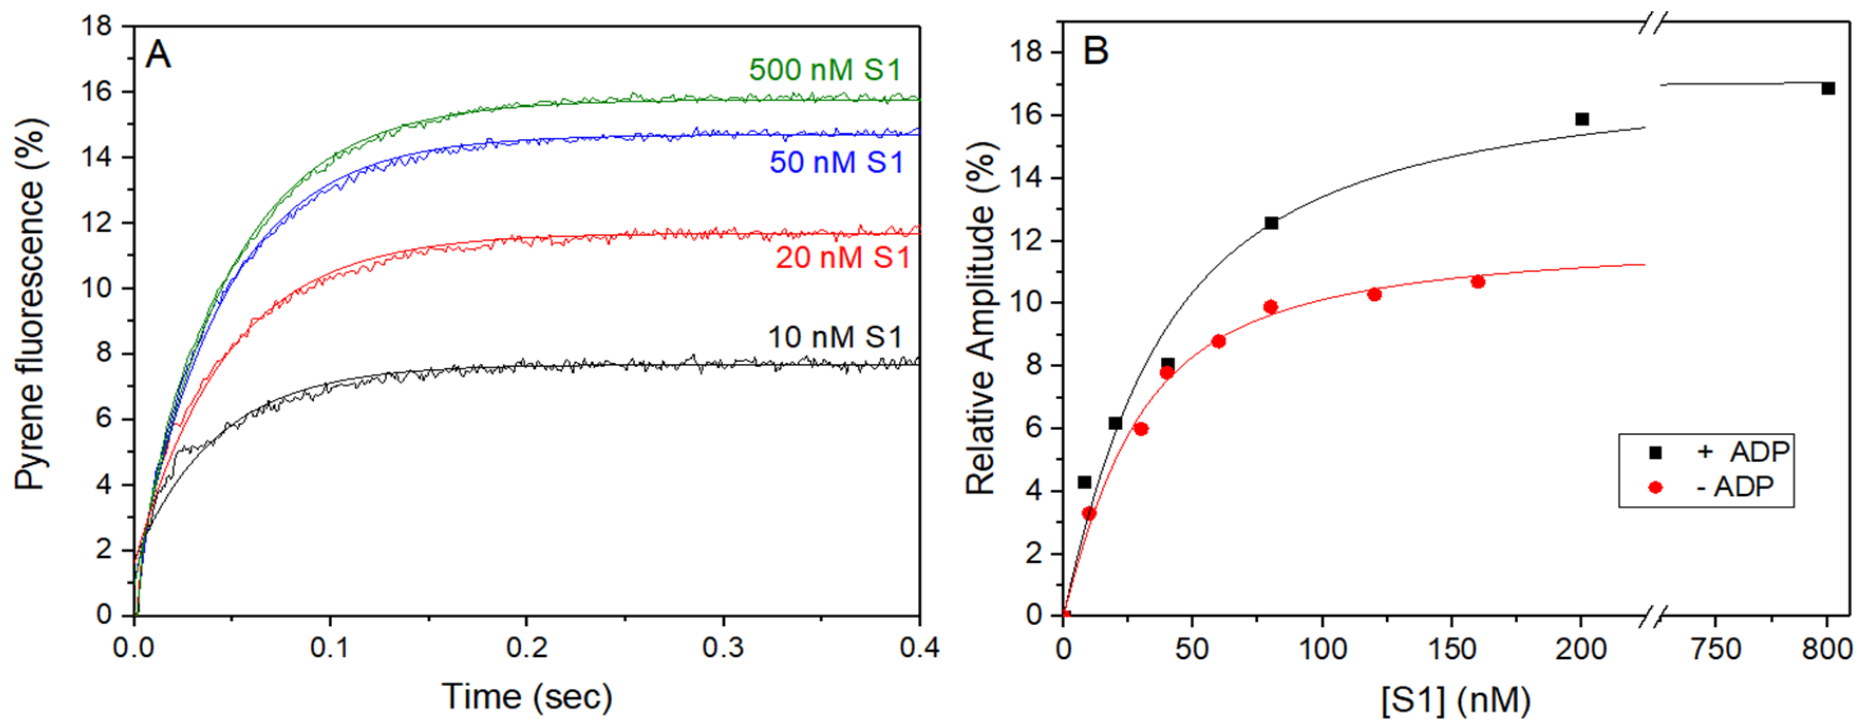

**Figure S2. H251N sS1 affinity for actin in the presence and absence of ADP.** (A) Example traces of the increase in pyrene fluorescence when 10  $\mu$ M ATP is mixed with 15 nM pyr-actin, 200  $\mu$ M ADP and varying concentrations of sS1 (10-500 nM). The pyr-actin was treated with hexokinase and  $A_{p_5}A$  to ensure no ATP was present in the protein before mixing in the stopped-flow. (B) Fluorescence amplitude plotted as a function of sS1 concentration can be described by a quadratic fit resulting in a  $K_{DA}$  of  $65.6 \pm 13$  in the presence of ADP, and a  $K_A$  of  $11.5 \pm 1.8$  nM when in the absence of ADP. The average values from 3 independent measurements are given in Table 1.

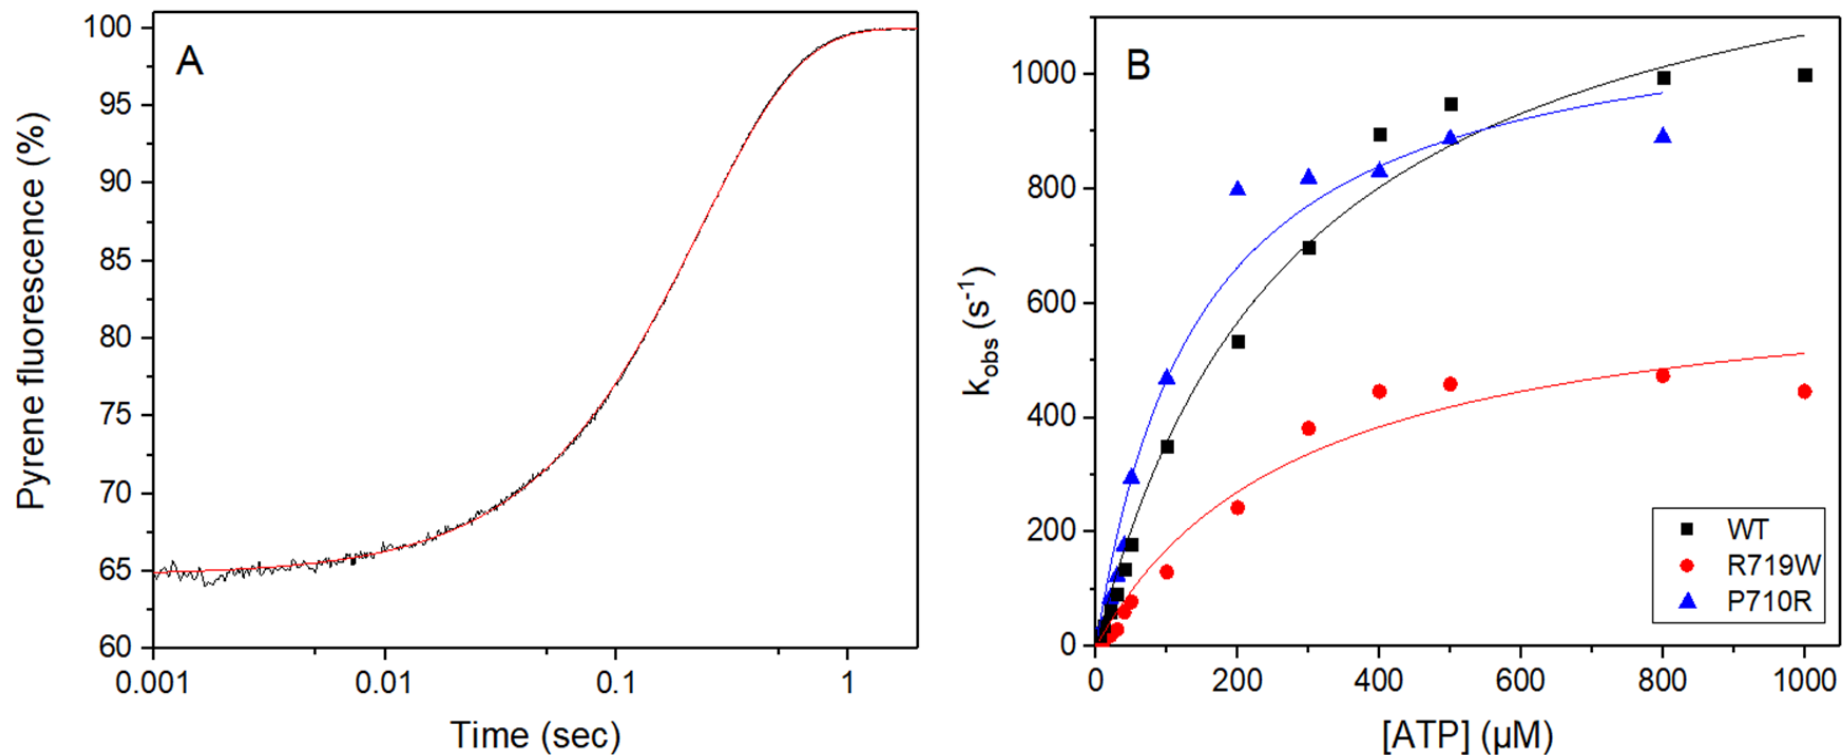

**Figure S3. ATP induced-dissociation of acto.sS1.** (A) Example stopped-flow trace to measure ATP-induced dissociation of pyr-actin from the WT sS1. 10 μM ATP was mixed with 50 nM pyr-actin.sS1, and the increase in pyrene fluorescence was measured. The experiment was repeated for all constructs and the observed amplitude of the fluorescence changes were similar (within 30%) in each case. (B) The effect of ATP concentration on  $k_{obs}$  for ATP-induced dissociation of pyr-actin.sS1 for 3 proteins; WT, R719W and P710R sS1. The gradient of the initial slope generates a second order rate constant of ATP binding,  $K_{TK+T^*}$ . The best fit to the hyperbola also yields a maximum  $k_{obs} = k_{+T^*}$  and the ATP concentration required for half maximum  $k_{obs} = K_T$ . Best fit values for 3 independent measurements of all constructs are in Table 1.

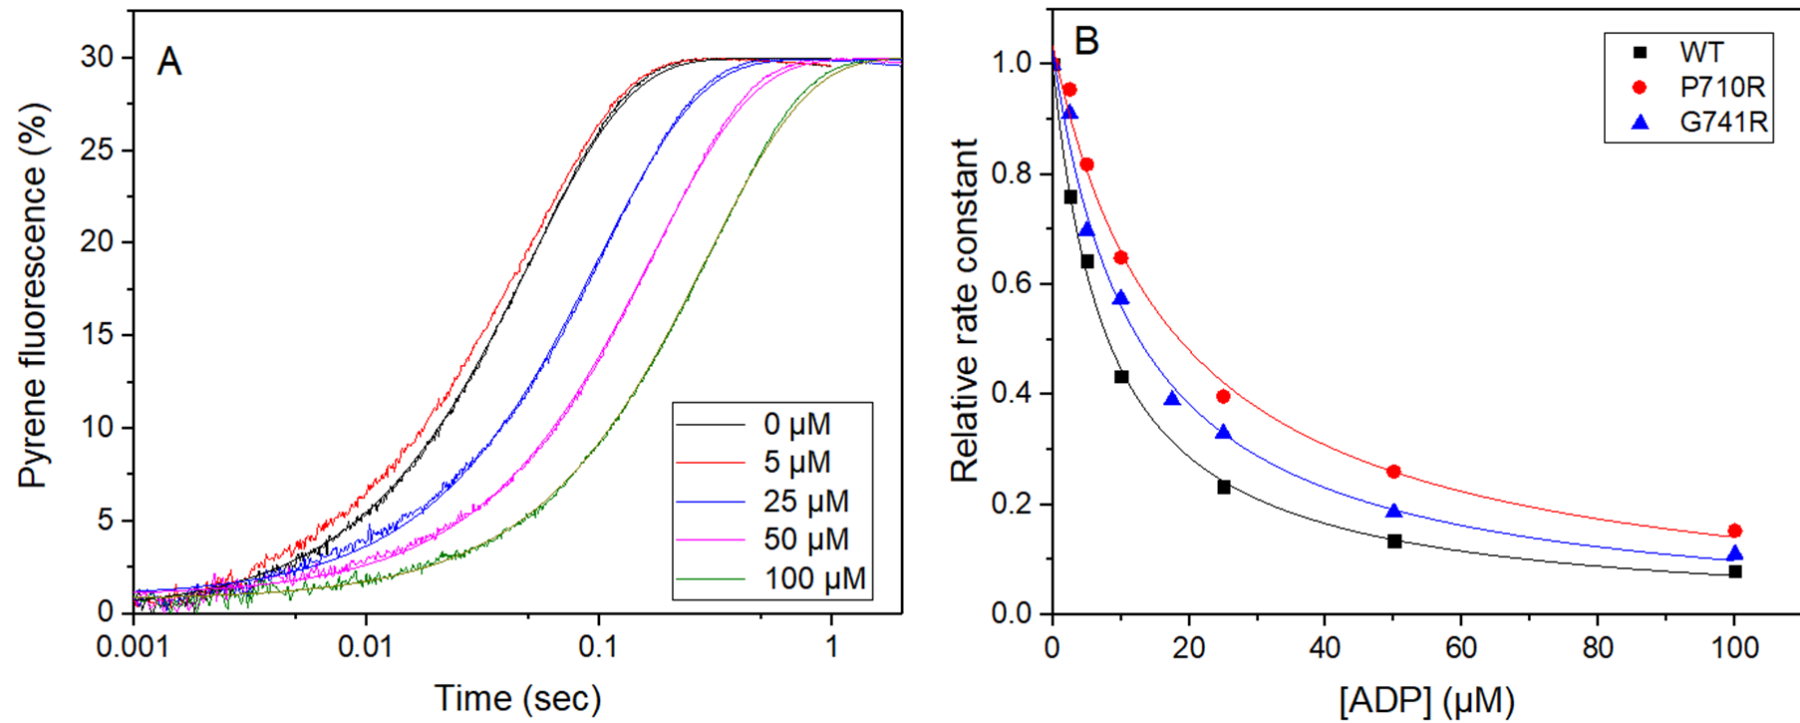

**Figure S4. ADP affinity for acto.sS1.** (A) Example transients showing an increase in pyrene fluorescence when 100 nM pyr-actin.WT sS1 is mixed with 10 μM ATP and 0-100 mM ADP. (B)  $k_{obs}$  plotted as a function of ADP concentration for WT, P710R and G741R sS1 proteins, showing hyperbolic dependence. The value of  $((K_D^*+1)/K_D K_D^*)$  is given by the ADP concentration at 50% inhibition.



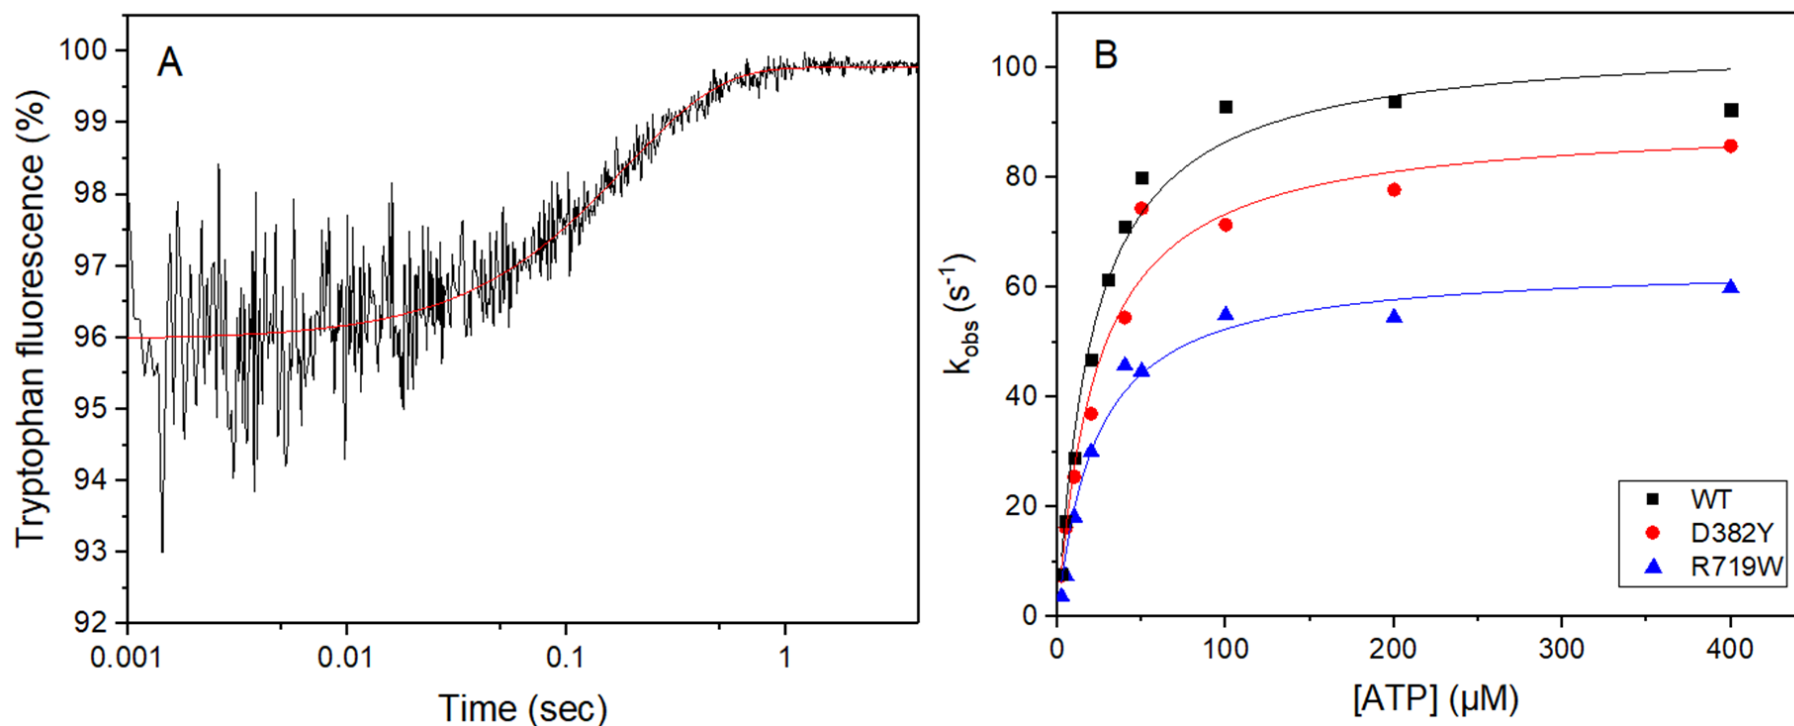

**Figure S5. ATP binding to sS1.** (A) Example stopped-flow trace to measure ATP binding to WT sS1. 10  $\mu M$  ATP was mixed with 200 nM sS1, and the increase in tryptophan fluorescence was measured. The sS1 was pre-treated with apyrase to ensure no nucleotide was present before mixing in the stopped-flow. Least squares best fit to a single exponential is shown in red with  $k_{obs} = 22 s^{-1}$  and a 4% increase in pyrene fluorescence. (B) The hyperbolic dependence of ATP concentration on  $k_{obs}$ . The best fit to a hyperbola yields  $\max k_{obs} = k_{+H} + k_{-H}$ , and the ATP concentration required for half maximum  $k_{obs} = K_{50\%}$ . The initial slope defines the second order rate constant of ATP binding to sS1. Best fit values for 3 independent measurements of all constructs are in Table 1.

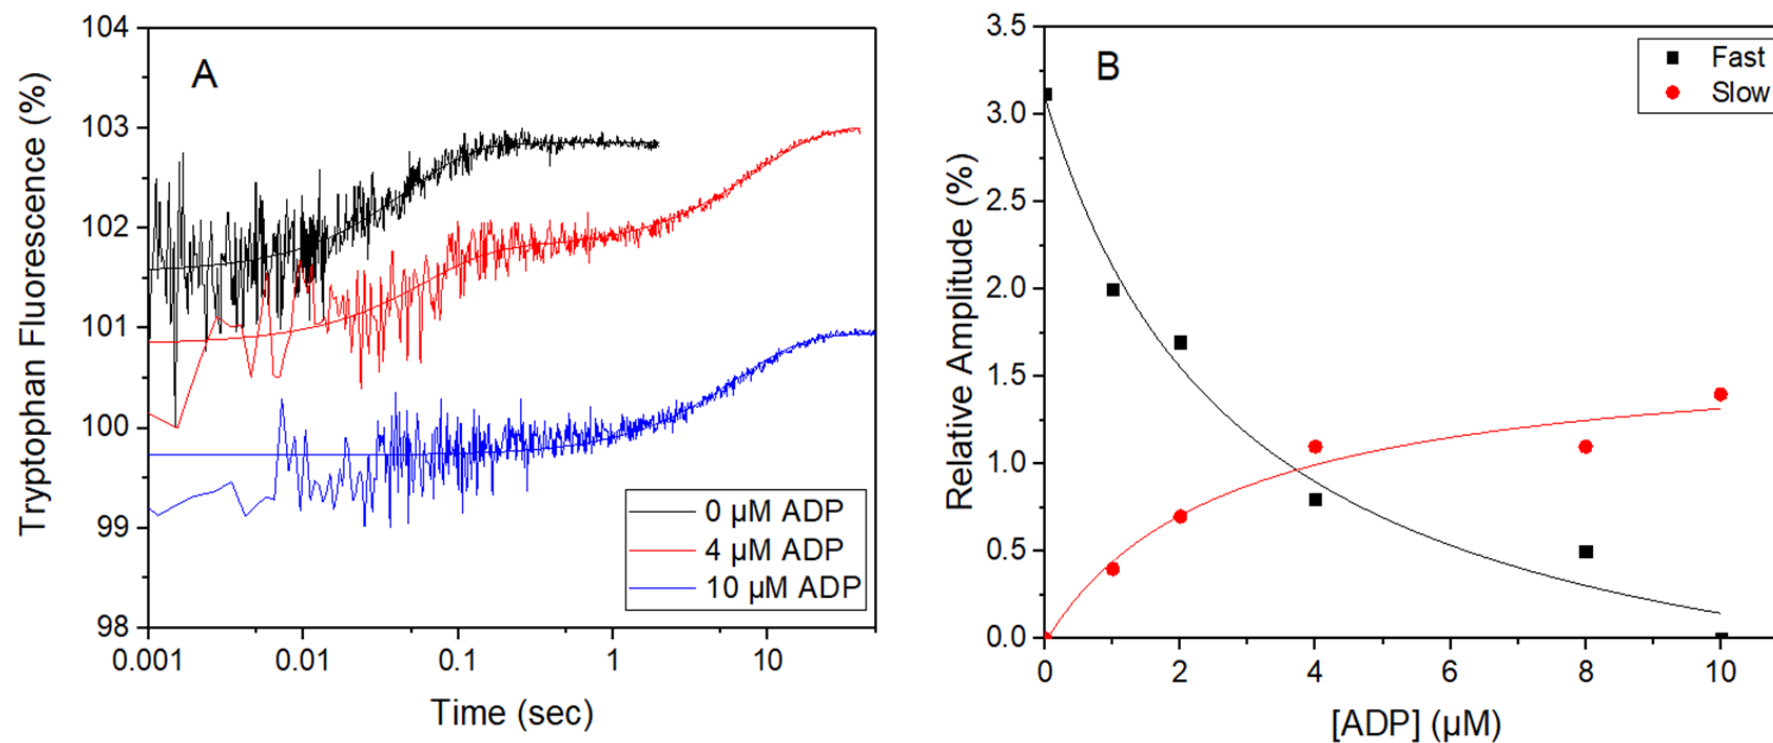

**Figure S6. ADP affinity for P710R sS1.** (A) Example traces of 50  $\mu\text{M}$  ATP mixed with 200 nM sS1 that is preincubated with ADP. The black trace contains no ADP, and results in a transient best described by a single exponential fit. In the presence of 4  $\mu\text{M}$  ADP, the amplitude of the fast phase decreased as the concentration of free sS1 decreases, and a second slow phase is observed representing the release of ADP from sS1. The transient is best described by a double exponential. At high ADP concentration, the amplitude of the fast phase is lost, and the amplitude of the slow phase can be best described by a single exponential. (B) The relative amplitudes of the fast and slow phases plotted against ADP concentration, which has a hyperbolic dependence. Table 1 lists averages for 3 independent measurements for all constructs.
